# Supplementary material
Source: PubMed Central journal article supplement (PMC5849424)
Supplement: NIHMS945958-supplement-supplement_1.pdf [file NIHMS945958-supplement-supplement_1.pdf]

## APPENDIX

Table 1A. True and estimated weights (averaged over 100 simulation samples) to combine three markers for the maximum ratio of mean and SD (efficacy comparison assumed at the end of trial, i.e., time=3, N=sample size for both training and validation data sets,  $\rho =0.2$ ,  $r=0.5$ )

| N   | True weights               | Estimated weights          | Bias (MSE) on weights | True Mean/SD | Estimated Mean/SD |
|-----|----------------------------|----------------------------|-----------------------|--------------|-------------------|
| 40  | 0.2912<br>0.3801<br>0.4745 | 0.3270<br>0.4111<br>0.5168 | 0.0363<br>0.0106      | -1.4598      | -1.4863           |
| 60  | 0.2912<br>0.3801<br>0.4745 | 0.2918<br>0.4072<br>0.4818 | 0.0117<br>0.0053      | -1.4598      | -1.4559           |
| 80  | 0.2912<br>0.3801<br>0.4745 | 0.2853<br>0.3850<br>0.4689 | -0.0022<br>0.0040     | -1.4598      | -1.4585           |
| 100 | 0.2912<br>0.3801<br>0.4745 | 0.3004<br>0.3838<br>0.4741 | 0.0042<br>0.0028      | -1.4598      | -1.4550           |
| 120 | 0.2912<br>0.3801<br>0.4745 | 0.2924<br>0.3844<br>0.4815 | 0.0041<br>0.0024      | -1.4598      | -1.4556           |
| 140 | 0.2912<br>0.3801<br>0.4745 | 0.3041<br>0.3761<br>0.4800 | 0.0047<br>0.0021      | -1.4598      | -1.4413           |

Table 1B. True and estimated weights (averaged over 100 simulation samples) to combine three markers for the maximum ratio of mean and SD (efficacy comparison assumed at the end of trial, i.e., time=3, N=sample size for both training and validation data sets,  $\rho =0.2, r=0.8$ )

| N   | True weights               | Estimated weights          | Bias (MSE) on weights | True Mean/SD | Estimated Mean/SD |
|-----|----------------------------|----------------------------|-----------------------|--------------|-------------------|
| 40  | 0.1694<br>0.3028<br>0.4444 | 0.2241<br>0.3348<br>0.4787 | 0.0403<br>0.0092      | -1.3138      | -1.3157           |
| 60  | 0.1694<br>0.3028<br>0.4444 | 0.2090<br>0.3045<br>0.4600 | 0.0189<br>0.0053      | -1.3138      | -1.3077           |
| 80  | 0.1694<br>0.3028<br>0.4444 | 0.1821<br>0.2795<br>0.4455 | -0.0032<br>0.0029     | -1.3138      | -1.3060           |
| 100 | 0.1694<br>0.3028<br>0.4444 | 0.1648<br>0.3063<br>0.4487 | 0.0010<br>0.0019      | -1.3138      | -1.3184           |
| 120 | 0.1694<br>0.3028<br>0.4444 | 0.1797<br>0.2926<br>0.4675 | 0.0077<br>0.0021      | -1.3138      | -1.3445           |
| 140 | 0.1694<br>0.3028<br>0.4444 | 0.1747<br>0.2927<br>0.4357 | -0.0045<br>0.0010     | -1.3138      | -1.3270           |

Table 1C. True and estimated weights (averaged over 100 simulation samples) to combine three markers for the maximum ratio of mean and SD (efficacy comparison assumed at the end of trial, i.e., time=3, N=sample size for both training and validation data sets,  $\rho =0.5, r=0.2$ )

| N   | True weights               | Estimated weights          | Bias (MSE) on weights | True Mean/SD | Estimated Mean/SD |
|-----|----------------------------|----------------------------|-----------------------|--------------|-------------------|
| 40  | 0.4412<br>0.5079<br>0.5787 | 0.4640<br>0.5340<br>0.6261 | 0.0321<br>0.0158      | -1.6804      | -1.6620           |
| 60  | 0.4412<br>0.5079<br>0.5787 | 0.4718<br>0.5346<br>0.5996 | 0.0261<br>0.0104      | -1.6804      | -1.7003           |
| 80  | 0.4412<br>0.5079<br>0.5787 | 0.4575<br>0.5483<br>0.6060 | 0.0280<br>0.0070      | -1.6804      | -1.6841           |
| 100 | 0.4412<br>0.5079<br>0.5787 | 0.4500<br>0.5382<br>0.6026 | 0.0210<br>0.0070      | -1.6804      | -1.6982           |
| 120 | 0.4412<br>0.5079<br>0.5787 | 0.4452<br>0.5199<br>0.5861 | 0.0078<br>0.0044      | -1.6804      | -1.6572           |
| 140 | 0.4412<br>0.5079<br>0.5787 | 0.4572<br>0.5189<br>0.5969 | 0.0151<br>0.0040      | -1.6804      | -1.7035           |

Table 1D. True and estimated weights (averaged over 100 simulation samples) to combine three markers for the maximum ratio of mean and SD (efficacy comparison assumed at the end of trial, i.e., time=3, N=sample size for both training and validation data sets,  $\rho =0.5, r=0.5$ )

| N   | True weights               | Estimated weights          | Bias (MSE) on weights | True Mean/SD | Estimated Mean/SD |
|-----|----------------------------|----------------------------|-----------------------|--------------|-------------------|
| 40  | 0.2912<br>0.3801<br>0.4745 | 0.3325<br>0.4437<br>0.5144 | 0.0483<br>0.0124      | -1.4598      | -1.4786           |
| 60  | 0.2912<br>0.3801<br>0.4745 | 0.3009<br>0.3918<br>0.5149 | 0.0206<br>0.0091      | -1.4598      | -1.4404           |
| 80  | 0.2912<br>0.3801<br>0.4745 | 0.3029<br>0.3929<br>0.4820 | 0.0107<br>0.0050      | -1.4598      | -1.4645           |
| 100 | 0.2912<br>0.3801<br>0.4745 | 0.2988<br>0.3880<br>0.4882 | 0.0097<br>0.0032      | -1.4598      | -1.4597           |
| 120 | 0.2912<br>0.3801<br>0.4745 | 0.2987<br>0.3979<br>0.5113 | 0.0207<br>0.0037      | -1.4598      | -1.4598           |
| 140 | 0.2912<br>0.3801<br>0.4745 | 0.3010<br>0.3892<br>0.4783 | 0.0075<br>0.0024      | -1.4598      | -1.4829           |

Table 1E. True and estimated weights (averaged over 100 simulation samples) to combine three markers for the maximum ratio of mean and SD (efficacy comparison assumed at the end of trial, i.e., time=3, N=sample size for both training and validation data sets,  $\rho =0.5$ ,  $r=0.8$ )

| N   | True weights               | Estimated weights          | Bias (MSE) on weights | True Mean/SD | Estimated Mean/SD |
|-----|----------------------------|----------------------------|-----------------------|--------------|-------------------|
| 40  | 0.1694<br>0.3028<br>0.4444 | 0.2070<br>0.3348<br>0.4725 | 0.0325<br>0.0079      | -1.3138      | -1.3364           |
| 60  | 0.1694<br>0.3028<br>0.4444 | 0.1943<br>0.3153<br>0.4456 | 0.0129<br>0.0028      | -1.3138      | -1.3325           |
| 80  | 0.1694<br>0.3028<br>0.4444 | 0.1880<br>0.3086<br>0.4672 | 0.0157<br>0.0034      | -1.3138      | -1.3149           |
| 100 | 0.1694<br>0.3028<br>0.4444 | 0.1757<br>0.3135<br>0.4380 | 0.0035<br>0.0021      | -1.3138      | -1.3335           |
| 120 | 0.1694<br>0.3028<br>0.4444 | 0.1750<br>0.3100<br>0.4497 | 0.0060<br>0.0024      | -1.3138      | -1.3128           |
| 140 | 0.1694<br>0.3028<br>0.4444 | 0.1733<br>0.3008<br>0.4554 | 0.0043<br>0.0017      | -1.3138      | -1.3289           |

Table 1F. True and estimated weights (averaged over 100 simulation samples) to combine three markers for the maximum ratio of mean and SD (efficacy comparison assumed at the end of trial, i.e., time=3, N=sample size for both training and validation data sets,  $\rho =0.8, r=0.2$ )

| N   | True weights               | Estimated weights          | Bias (MSE) on weights | True Mean/SD | Estimated Mean/SD |
|-----|----------------------------|----------------------------|-----------------------|--------------|-------------------|
| 40  | 0.4412<br>0.5079<br>0.5787 | 0.4967<br>0.5668<br>0.6259 | 0.0539<br>0.0176      | -1.6804      | -1.6621           |
| 60  | 0.4412<br>0.5079<br>0.5787 | 0.4940<br>0.5593<br>0.6318 | 0.0525<br>0.0151      | -1.6804      | -1.7136           |
| 80  | 0.4412<br>0.5079<br>0.5787 | 0.4698<br>0.5455<br>0.5818 | 0.0231<br>0.0102      | -1.6804      | -1.6560           |
| 100 | 0.4412<br>0.5079<br>0.5787 | 0.4671<br>0.5145<br>0.6241 | 0.0260<br>0.0068      | -1.6804      | -1.6678           |
| 120 | 0.4412<br>0.5079<br>0.5787 | 0.4523<br>0.5257<br>0.5863 | 0.0122<br>0.0043      | -1.6804      | -1.6640           |
| 140 | 0.4412<br>0.5079<br>0.5787 | 0.4568<br>0.5169<br>0.5968 | 0.0142<br>0.0038      | -1.6804      | -1.6942           |

Table 1G. True and estimated weights (averaged over 100 simulation samples) to combine three markers for the maximum ratio of mean and SD (efficacy comparison assumed at the end of trial, i.e., time=3, N=sample size for both training and validation data sets,  $\rho =0.8, r=0.5$ )

| N   | True weights               | Estimated weights          | Bias (MSE) on weights | True Mean/SD | Estimated Mean/SD |
|-----|----------------------------|----------------------------|-----------------------|--------------|-------------------|
| 40  | 0.2912<br>0.3801<br>0.4745 | 0.3316<br>0.4149<br>0.5215 | 0.0407<br>0.0139      | -1.4598      | -1.4733           |
| 60  | 0.2912<br>0.3801<br>0.4745 | 0.3104<br>0.3908<br>0.5034 | 0.0196<br>0.0063      | -1.4598      | -1.4457           |
| 80  | 0.2912<br>0.3801<br>0.4745 | 0.2853<br>0.4045<br>0.5030 | 0.0157<br>0.0047      | -1.4598      | -1.4639           |
| 100 | 0.2912<br>0.3801<br>0.4745 | 0.3104<br>0.3962<br>0.5014 | 0.0207<br>0.0065      | -1.4598      | -1.4470           |
| 120 | 0.2912<br>0.3801<br>0.4745 | 0.2897<br>0.3969<br>0.4872 | 0.0093<br>0.0026      | -1.4598      | -1.4409           |
| 140 | 0.2912<br>0.3801<br>0.4745 | 0.3110<br>0.3878<br>0.4668 | 0.0066<br>0.0024      | -1.4598      | -1.4637           |

Table 1H. True and estimated weights (averaged over 100 simulation samples) to combine three markers for the maximum ratio of mean and SD (efficacy comparison assumed at the end of trial, i.e., time=3, N=sample size for both training and validation data sets,  $\rho =0.8, r=0.8$ )

| N   | True weights               | Estimated weights          | Bias (MSE) on weights | True Mean/SD | Estimated Mean/SD |
|-----|----------------------------|----------------------------|-----------------------|--------------|-------------------|
| 40  | 0.1694<br>0.3028<br>0.4444 | 0.2223<br>0.3148<br>0.4733 | 0.0312<br>0.0080      | -1.3138      | -1.3591           |
| 60  | 0.1694<br>0.3028<br>0.4444 | 0.1991<br>0.2990<br>0.4685 | 0.0166<br>0.0052      | -1.3138      | -1.3214           |
| 80  | 0.1694<br>0.3028<br>0.4444 | 0.1882<br>0.3020<br>0.4647 | 0.0127<br>0.0033      | -1.3138      | -1.3155           |
| 100 | 0.1694<br>0.3028<br>0.4444 | 0.1609<br>0.3152<br>0.4741 | 0.0112<br>0.0033      | -1.3138      | -1.3121           |
| 120 | 0.1694<br>0.3028<br>0.4444 | 0.1719<br>0.3015<br>0.4632 | 0.0066<br>0.0020      | -1.3138      | -1.3207           |
| 140 | 0.1694<br>0.3028<br>0.4444 | 0.1912<br>0.3027<br>0.4604 | 0.0125<br>0.0022      | -1.3138      | -1.3212           |



Table 2A. Total sample sizes (averaged over 100 simulated pairs of data sets) required for 80% power to detect specified effect sizes for  $\rho = r = 0.5$  in a 1:1 two-arm clinical trial (weights estimated from training data set with 60 subjects; mean and SD on the combined outcome estimated from either the same data set or another independent sample of the same size. Efficacy comparison assumed at time=3.  $N_i$ =total sample size using  $i$ -th efficacy outcome alone;  $N$  =total sample size using the true weight for the combined outcome;  $NP$  =total sample size using the combined outcome with weights estimated from training data sets and mean/SD estimated from validation data sets;  $NS$  = total sample size using the combined outcome with weights and SD estimated from the same data sets. ES=effect size as a percentage of improvement from the estimated mean for the placebo at  $t=3$ )

| ES  | $N_1$ | $N_2$ | $N_3$ | $N$ | $NP$ | $NS$ | $NP - NS$ |
|-----|-------|-------|-------|-----|------|------|-----------|
| 20% | 852   | 720   | 575   | 386 | 399  | 368  | 32        |
| 25% | 545   | 461   | 368   | 247 | 256  | 236  | 20        |
| 30% | 379   | 321   | 256   | 172 | 178  | 164  | 14        |
| 35% | 279   | 236   | 188   | 127 | 131  | 121  | 11        |
| 40% | 214   | 181   | 144   | 97  | 100  | 93   | 8         |
| 45% | 169   | 143   | 114   | 77  | 80   | 73   | 7         |
| 50% | 137   | 116   | 93    | 63  | 65   | 60   | 5         |

Table 2B. Total sample sizes (averaged over 100 simulated pairs of data sets) required for 80% power to detect specified effect sizes for  $\rho = r = 0.5$  in a 1:1 two-arm clinical trial (weights estimated from training data set with 80 subjects; mean and SD on the combined outcome estimated from either the same data set or another independent sample of the same size. Efficacy comparison assumed at time=3.  $N_i$  =total sample size using  $i$ -th efficacy outcome alone;  $N$  =total sample size using the true weight for the combined outcome;  $NP$  =total sample size using the combined outcome with weights estimated from training data sets and mean/SD estimated from validation data sets;  $NS$  = total sample size using the combined outcome with weights and SD estimated from the same data sets. ES=effect size as a percentage of improvement from the estimated mean for the placebo at  $t=3$ )

| ES  | $N_1$ | $N_2$ | $N_3$ | $N$ | $NP$ | $NS$ | $NP - NS$ |
|-----|-------|-------|-------|-----|------|------|-----------|
| 20% | 806   | 695   | 554   | 370 | 380  | 374  | 6         |
| 25% | 516   | 445   | 355   | 237 | 244  | 240  | 4         |
| 30% | 359   | 309   | 247   | 165 | 170  | 167  | 3         |
| 35% | 264   | 228   | 182   | 121 | 125  | 123  | 2         |
| 40% | 202   | 175   | 139   | 93  | 96   | 94   | 2         |
| 45% | 160   | 138   | 110   | 74  | 76   | 75   | 2         |
| 50% | 130   | 112   | 90    | 60  | 62   | 61   | 1         |

Table 2C. Total sample sizes (averaged over 100 simulated pairs of data sets) required for 80% power to detect specified effect sizes for  $\rho = r = 0.5$  in a 1:1 two-arm clinical trial (weights estimated from training data set with 100 subjects; mean and SD on the combined outcome estimated from either the same data set or another independent sample of the same size. Efficacy comparison assumed at time=3.  $N_i$  =total sample size using  $i$ -th efficacy outcome alone;  $N$  =total sample size using the true weight for the combined outcome;  $NP$  =total sample size using the combined outcome with weights estimated from training data sets and mean/SD estimated from validation data sets;  $NS$  = total sample size using the combined outcome with weights and SD estimated from the same data sets. ES=effect size as a percentage of improvement from the estimated mean for the placebo at  $t=3$ )

| ES  | $N_1$ | $N_2$ | $N_3$ | $N$ | $NP$ | $NS$ | $NP - NS$ |
|-----|-------|-------|-------|-----|------|------|-----------|
| 20% | 811   | 665   | 574   | 377 | 381  | 366  | 15        |
| 25% | 520   | 426   | 368   | 242 | 244  | 234  | 10        |
| 30% | 361   | 296   | 256   | 168 | 170  | 163  | 7         |
| 35% | 266   | 218   | 188   | 124 | 125  | 120  | 5         |
| 40% | 204   | 167   | 144   | 95  | 96   | 92   | 4         |
| 45% | 161   | 132   | 114   | 75  | 76   | 73   | 3         |
| 50% | 131   | 107   | 93    | 61  | 62   | 59   | 3         |

Table 2D. Total sample sizes (averaged over 100 simulated pairs of data sets) required for 80% power to detect specified effect sizes for  $\rho = r = 0.5$  in a 1:1 two-arm clinical trial (weights estimated from training data set with 120 subjects; mean and SD on the combined outcome estimated from either the same data set or another independent sample of the same size. Efficacy comparison assumed at time=3.  $N_i$ =total sample size using  $i$ -th efficacy outcome alone;  $N$  =total sample size using the true weight for the combined outcome;  $NP$  =total sample size using the combined outcome with weights estimated from training data sets and mean/SD estimated from validation data sets;  $NS$  = total sample size using the combined outcome with weights and SD estimated from the same data sets. ES=effect size as a percentage of improvement from the estimated mean for the placebo at  $t=3$ )

| ES  | $N_1$ | $N_2$ | $N_3$ | $N$ | $NP$ | $NS$ | $NP - NS$ |
|-----|-------|-------|-------|-----|------|------|-----------|
| 20% | 807   | 658   | 572   | 372 | 377  | 353  | 24        |
| 25% | 517   | 421   | 367   | 239 | 241  | 227  | 15        |
| 30% | 359   | 293   | 255   | 166 | 168  | 158  | 11        |
| 35% | 264   | 215   | 188   | 122 | 124  | 116  | 8         |
| 40% | 202   | 165   | 144   | 94  | 95   | 89   | 6         |
| 45% | 160   | 131   | 114   | 74  | 75   | 71   | 5         |
| 50% | 130   | 106   | 92    | 60  | 61   | 57   | 4         |

Table 2E. Total sample sizes (averaged over 100 simulated pairs of data sets) required for 80% power to detect specified effect sizes for  $\rho = r = 0.5$  in a 1:1 two-arm clinical trial (weights estimated from training data set with 140 subjects; mean and SD on the combined outcome estimated from either the same data set or another independent sample of the same size. Efficacy comparison assumed at time=3.  $N_i$ =total sample size using  $i$ -th efficacy outcome alone;  $N$  =total sample size using the true weight for the combined outcome;  $NP$  =total sample size using the combined outcome with weights estimated from training data sets and mean/SD estimated from validation data sets;  $NS$  = total sample size using the combined outcome with weights and SD estimated from the same data sets. ES=effect size as a percentage of improvement from the estimated mean for the placebo at  $t=3$ )

| ES  | $N_1$ | $N_2$ | $N_3$ | $N$ | $NP$ | $NS$ | $NP - NS$ |
|-----|-------|-------|-------|-----|------|------|-----------|
| 20% | 809   | 647   | 545   | 362 | 365  | 368  | -2        |
| 25% | 518   | 414   | 349   | 232 | 234  | 236  | -1        |
| 30% | 360   | 288   | 243   | 161 | 163  | 164  | -1        |
| 35% | 265   | 212   | 178   | 119 | 120  | 121  | 0         |
| 40% | 203   | 162   | 137   | 91  | 92   | 93   | 0         |
| 45% | 161   | 129   | 108   | 72  | 73   | 73   | 0         |
| 50% | 130   | 104   | 88    | 59  | 59   | 60   | 0         |
